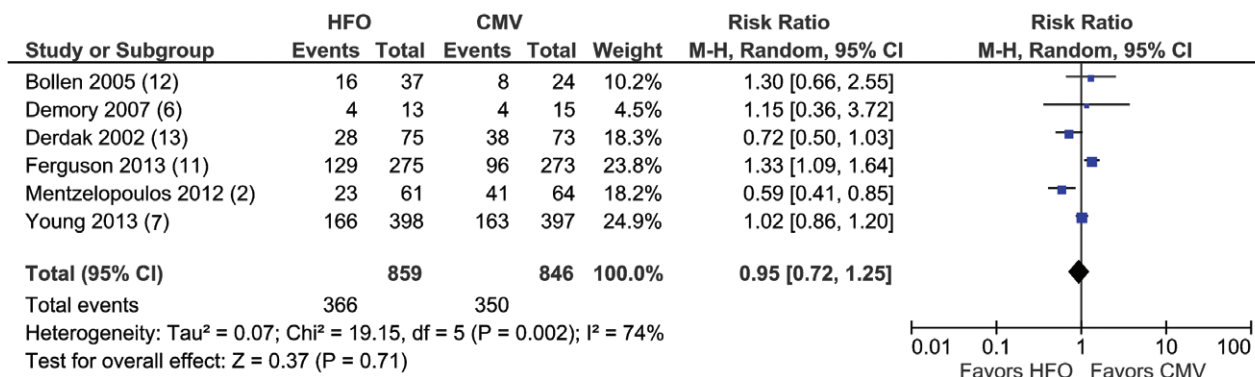

**Fig. 1.** Corrected forest plot of the risk ratio of 30-day, or intensive care unit, or in-hospital mortality in the studies included in the meta-analysis of Maitra *et al.*<sup>1</sup> Numbers in parentheses correspond to current article references. CMV = conventional mechanical ventilation (corresponding to standard treatment); HFO = high-frequency oscillation (corresponding to experimental treatment); M-H = Mantel-Haenszel.

- Mentzelopoulos SD, Malachias S, Zintzaras E, Kokkoris S, Zakyntinos E, Makris D, Magira E, Markaki V, Roussos C, Zakyntinos SG: Intermittent recruitment with high-frequency oscillation/tracheal gas insufflation in acute respiratory distress syndrome. *Eur Respir J* 2012; 39:635–47
- HFO-TGI Study Protocol Access: Homepage of the Scientific Society of Evangelismos Hospital (scroll down to the end of the webpage). Available at: <http://www.evangelismos-hosp.gr/0010000688/%CE%B9%CF%83%CF%84%CE%BF%CF%81%CE%B9%CE%BA%CE%BF-%CE%B5%CE%B5%CF%80%CE%B5%CE%B5.html>. Accessed June 21, 2014
- Sud S, Sud M, Friedrich JO, Meade MO, Ferguson ND, Wunsch H, Adhikari NK: High frequency oscillation in patients with acute lung injury and acute respiratory distress syndrome (ARDS): Systematic review and meta-analysis. *BMJ* 2010; 340:c2327
- Mentzelopoulos SD, Roussos C, Koutsoukou A, Sourlas S, Malachias S, Lachana A, Zakyntinos SG: Acute effects of combined high-frequency oscillation and tracheal gas insufflation in severe acute respiratory distress syndrome. *Crit Care Med* 2007; 35:1500–8
- Demory D, Michelet P, Arnal JM, Donati S, Forel JM, Gainnier M, Brégeon F, Papazian L: High-frequency oscillatory ventilation following prone positioning prevents a further impairment in oxygenation. *Crit Care Med* 2007; 35:106–11
- Young D, Lamb SE, Shah S, MacKenzie I, Tunnicliffe W, Lall R, Rowan K, Cuthbertson BH; OSCAR Study Group: High-frequency oscillation for acute respiratory distress syndrome. *N Engl J Med* 2013; 368:806–13
- Huang CT, Lin HH, Ruan SY, Lee MS, Tsai YJ, Yu CJ: Efficacy and adverse events of high-frequency oscillatory ventilation in adult patients with acute respiratory distress syndrome: A meta-analysis. *Crit Care* 2014; 18:R102
- Gu XL, Wu GN, Yao YW, Shi DH, Song Y: Is high-frequency oscillatory ventilation more effective and safer than conventional protective ventilation in adult acute respiratory distress syndrome patients? A meta-analysis of randomized controlled trials. *Crit Care* 2014; 18:R111
- Vrettou CS, Zakyntinos SG, Malachias S, Mentzelopoulos SD: The effect of high-frequency oscillatory ventilation combined with tracheal gas insufflation on extravascular lung water in patients with acute respiratory distress syndrome: A randomized, crossover, physiologic study. *J Crit Care* 2014; 29:568–73
- Ferguson ND, Cook DJ, Guyatt GH, Mehta S, Hand L, Austin P, Zhou Q, Matte A, Walter SD, Lamontagne F, Granton JT, Arabi YM, Arroliga AC, Stewart TE, Slutsky AS, Meade MO; OSCILLATE Trial Investigators; Canadian Critical Care Trials Group: High-frequency oscillation in early acute respiratory distress syndrome. *N Engl J Med* 2013; 368:795–805
- Bollen CW, van Well GT, Sherry T, Beale RJ, Shah S, Findlay G, Monchi M, Chiche JD, Weiler N, Uiterwaal CS, van Vught AJ: High frequency oscillatory ventilation compared with conventional mechanical ventilation in adult respiratory distress syndrome: A randomized controlled trial [ISRCTN24242669]. *Crit Care* 2005; 9:R430–9
- Derdak S, Mehta S, Stewart TE, Smith T, Rogers M, Buchman TG, Carlin B, Lowson S, Granton J; Multicenter Oscillatory Ventilation For Acute Respiratory Distress Syndrome Trial (MOAT) Study Investigators: High-frequency oscillatory ventilation for acute respiratory distress syndrome in adults: A randomized, controlled trial. *Am J Respir Crit Care Med* 2002; 166:801–8
- Vrettou CS, Zakyntinos SG, Malachias S, Mentzelopoulos SD: High-frequency oscillation and tracheal gas insufflation in patients with severe acute respiratory distress syndrome and traumatic brain injury: An interventional physiological study. *Crit Care* 2013; 17:R136

(Accepted for publication September 21, 2015.)

### In Reply:

We have read the letter by Mentzelopoulos *et al.* regarding the possible inaccuracy in a few outcomes of our analysis.<sup>1</sup> We sincerely apologize for the possible duplication of a few patients from inclusion of a previous study.<sup>2</sup> Although this error is purely unintentional, we are sorry to say that we were unable to find a statement regarding overlapping of the patients in the Methods section of the later study.<sup>3</sup> However, a reanalysis of our primary outcome did not change the primary finding of our meta-analysis (fig. 1). Mentzelopoulos *et al.* correctly reported that  $I^2$ , which is the heterogeneity value, and CI, are different. We have already used a random effect model in all our analysis even if the  $I^2$  value is low due to possible clinical heterogeneity in the included studies. The 95% CI is used to estimate the precision of the odds ratio.<sup>4</sup> If a 95% CI for the odds ratio does not include 1 (the null value), then the odd ratios are said to be statistically significantly different. We also accept the possibility of biases from inclusion of the randomized controlled trial by Demory *et al.*<sup>5</sup> However, reanalyzing in-hospital/30-day/intensive care unit

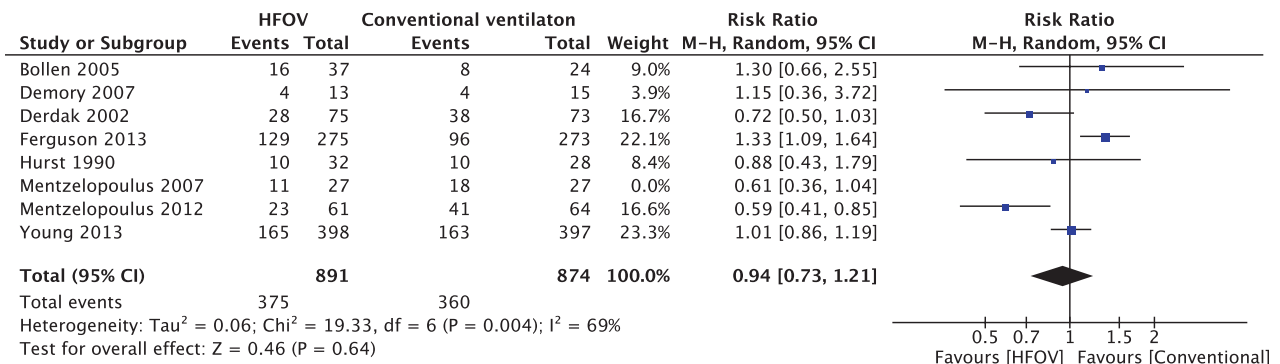

**Fig. 1.** Corrected forest plot for in-hospital/intensive care unit/30-day mortality. HFOV = high-frequency oscillatory ventilation; M-H = Mantel-Haenszel.

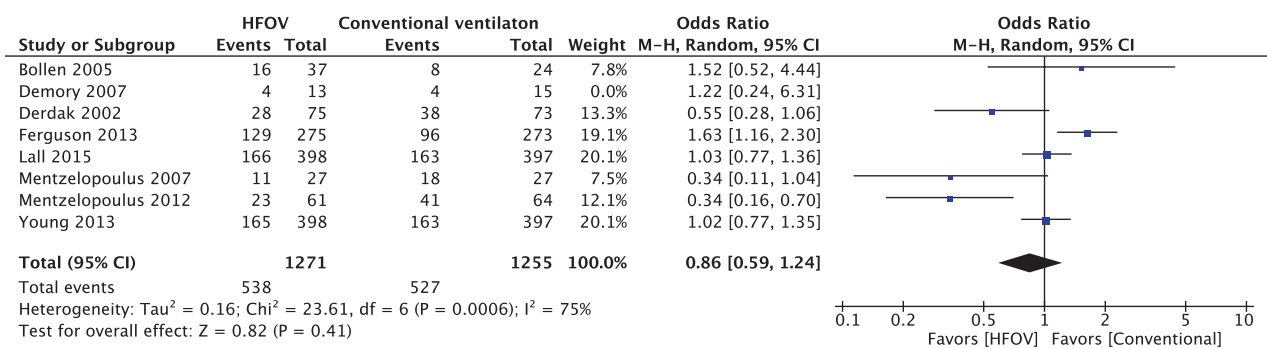

**Fig. 2.** Forest plot of in-hospital/intensive care unit/30-day mortality (excluding the study by Demory *et al.*<sup>5</sup>). HFOV = high-frequency oscillatory ventilation; M-H = Mantel-Haenszel.

mortality excluding Demory *et al.*'s trial did not change our primary findings (fig. 2). Kindly refer to figure 3 of the study by Young *et al.*,<sup>6</sup> which clearly mentions that the number of survivors at day 30 was 233 in the high-frequency oscillatory ventilation group. After exclusion of the preliminary findings of Mentzelopoulos *et al.*,<sup>2</sup> duration of mechanical ventilation and incidence of barotrauma remain unchanged from our primary findings.

## Competing Interests

The authors declare no competing interests.

**Souvik Maitra, M.D., D.N.B., Sulagna Bhattacharjee, M.D., D.N.B., Puneet Khanna, M.D., Dalim K. Baidya, M.D.** All India Institute of Medical Sciences, New Delhi, India (D.K.B.). dalimkumarb001@yahoo.co.in

## References

1. Maitra S, Bhattacharjee S, Khanna P, Baidya DK: High-frequency ventilation does not provide mortality benefit in comparison with conventional lung-protective ventilation in acute respiratory distress syndrome: A meta-analysis of the randomized controlled trials. *ANESTHESIOLOGY* 2015; 122:841–51
2. Mentzelopoulos SD, Roussos C, Koutsoukou A, Sourlas S, Malachias S, Lachana A, Zakynthinos SG: Acute effects of combined high-frequency oscillation and tracheal gas insufflation in severe acute respiratory distress syndrome. *Crit Care Med* 2007; 35:1500–8
3. Mentzelopoulos SD, Malachias S, Zintzaras E, Kokkoris S, Zakynthinos E, Makris D, Magira E, Markaki V, Roussos C, Zakynthinos SG: Intermittent recruitment with high-frequency oscillation/tracheal gas insufflation in acute respiratory distress syndrome. *Eur Respir J* 2012; 39:635–47
4. Szumilas M: Explaining odds ratios. *J Can Acad Child Adolesc Psychiatry* 2010; 19:227–9
5. Demory D, Michelet P, Arnal JM, Donati S, Forel JM, Gainnier M, Brégeon F, Papazian L: High-frequency oscillatory ventilation following prone positioning prevents a further impairment in oxygenation. *Crit Care Med* 2007; 35:106–11
6. Young D, Lamb SE, Shah S, MacKenzie I, Tunnicliffe W, Lall R, Rowan K, Cuthbertson BH; OSCAR Study Group: High-frequency oscillation for acute respiratory distress syndrome. *N Engl J Med* 2013; 368:806–13

(Accepted for publication September 21, 2015.)
